# Supplementary material for: CuO nanoparticle penetration through intact and damaged human skin
Source: Royal Society of Chemistry journal article supplement (doi:10.1039/c9nj03373d), 2019-01-01
Supplement: c9nj03373d1.pdf [file c9nj03373d1.pdf]

# CuO nanoparticles penetration through intact and damaged human skin

---

*Ilaria Zanon<sup>a,b</sup>, Matteo Crosera<sup>c</sup>, Simona Ortelli<sup>a</sup>, Magda Blosi<sup>a\*</sup>, Gianpiero Adami<sup>c</sup>, Francesca Larese Filon<sup>b</sup>,  
Anna Luisa Costa<sup>a</sup>*

<sup>a</sup> *CNR-ISTEC-National Research Council of Italy, Institute of Science and Technology for Ceramics, Via Granarolo 64 I-48018, Faenza, RA, Italy. E mail: [magda.blosi@istec.cnr.it](mailto:magda.blosi@istec.cnr.it)*

<sup>b</sup> *Clinical Unit of Occupational Medicine, Department of Medical and Surgical Sciences, University of Trieste, Via della Pietà 2/2, 34129 Trieste, Italy.*

<sup>c</sup> *Department of Chemical and Pharmaceutical Sciences, University of Trieste, via L. Giorgieri 1, 34127 Trieste, Italy.*

New Journal of Chemistry - ESI

Table S1: Hydrodynamic diameters ( $d_{DLS}$ ) and  $\zeta$ -potentials ( $\zeta$ -potELS) of CuO NP dispersed in synthetic sweat ( $100 \text{ mg L}^{-1}$ ).

| <i>N° batch</i> | <i>After 1h</i> |                             |                      | <i>After 24h</i> |                             |                      |
|-----------------|-----------------|-----------------------------|----------------------|------------------|-----------------------------|----------------------|
|                 | <i>pH</i>       | <i>d<sub>DLS</sub> (nm)</i> | <i>ζ-potELS (mV)</i> | <i>pH</i>        | <i>d<sub>DLS</sub> (nm)</i> | <i>ζ-potELS (mV)</i> |
| <b>1</b>        | 5.8             | 7385 ± 1619                 | -7.2 ± 0.6           | 5.8              | 8889 ± 1360                 | -4.4 ± 0.4           |
| <b>2</b>        | 5.8             | 3561 ± 1054                 | -5.5 ± 0.5           | 5.6              | 2233 ± 246                  | -6.3 ± 0.2           |
| <b>3</b>        | 5.7             | 4567 ± 1209                 | -7.2 ± 0.2           | 5.5              | 3109 ± 752                  | -6.9 ± 0.3           |

Table S2: Measurements of static dissolution ( $\text{Cu}_{dissolved}/\text{Cu}_{total}$  weight ratio %) of CuO NP dispersed in synthetic sweat ( $100 \text{ mg L}^{-1}$ ).

| <i>N° batch</i> | <i>After 1h</i>                                                 | <i>After 24h</i>                                                |
|-----------------|-----------------------------------------------------------------|-----------------------------------------------------------------|
|                 | <i>Cu<sub>dissolved</sub>/Cu<sub>total</sub> weight ratio %</i> | <i>Cu<sub>dissolved</sub>/Cu<sub>total</sub> weight ratio %</i> |
| <b>1</b>        | 10.9                                                            | 13.6                                                            |
| <b>2</b>        | 17.3                                                            | 21.6                                                            |
| <b>3</b>        | 20.4                                                            | 25.6                                                            |
| <b>AVERAGE</b>  | <b>16.2 ± 4.9</b>                                               | <b>20.3 ± 6.1</b>                                               |

Table S3: Copper skin penetration at 24 h obtained by ICP-OES measurements.

|                     | <b>Epidermis<br/>penetration<br/>(<math>\mu\text{g cm}^{-2}</math>)</b> | <b>Dermis<br/>penetration<br/>(<math>\mu\text{g cm}^{-2}</math>)</b> | <b>Total<br/>penetration<br/>(<math>\mu\text{g cm}^{-2}</math>)</b> |
|---------------------|-------------------------------------------------------------------------|----------------------------------------------------------------------|---------------------------------------------------------------------|
| <b>Intact skin</b>  | 1.05 ± 0.45                                                             | 0.40 ± 0.03                                                          | 1.45 ± 0.42                                                         |
| <b>Damaged skin</b> | 2.73 ± 1.90                                                             | 7.09 ± 5.78                                                          | 9.82 ± 7.67                                                         |
